# Supplementary material for: Single-cell sequencing reveals the potential oncogenic expression atlas of human iPSC-derived cardiomyocytes
Source: PubMed Central journal article supplement (PMC7903994; doi:10.1242/bio.053348), 2021-02-15
Supplement: biolopen-10-053348-s1.pdf [file biolopen-10-053348-s1.pdf]

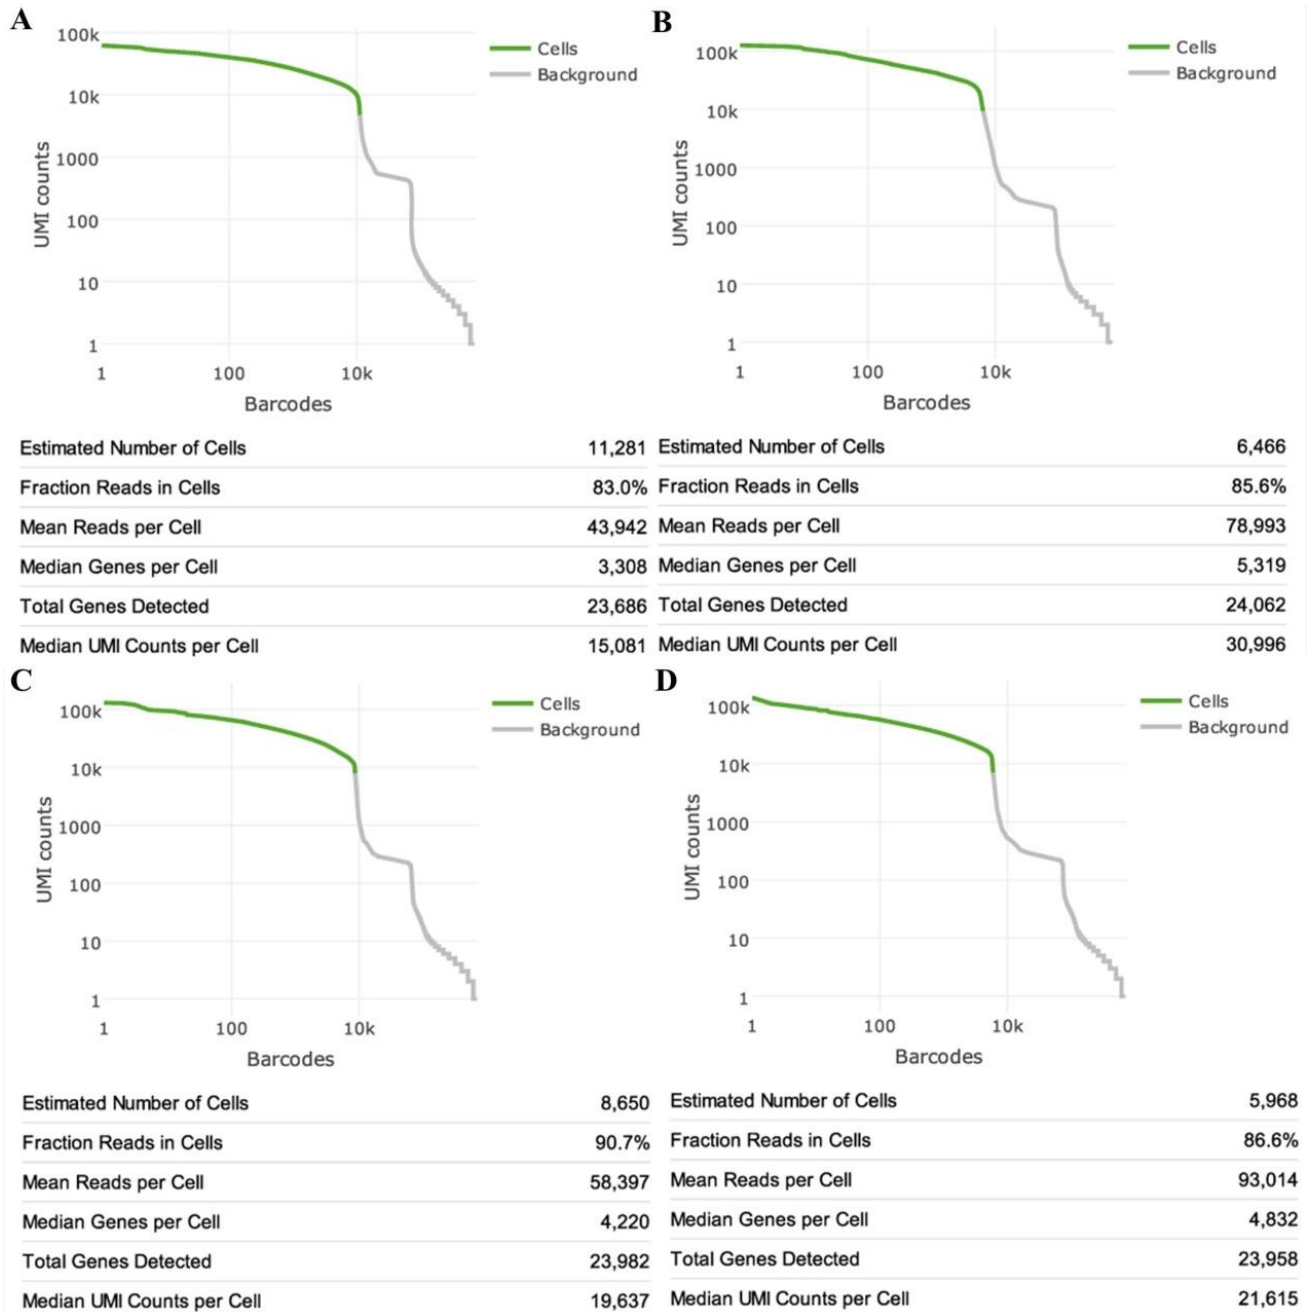

**Figure S1.** Summary of the single-cell sequencing output data of different sample groups. (A) the sample collected on day 0; (B) the sample collected on day 2; (C) the samples collected on day 4; (D) the samples collected on day 10.

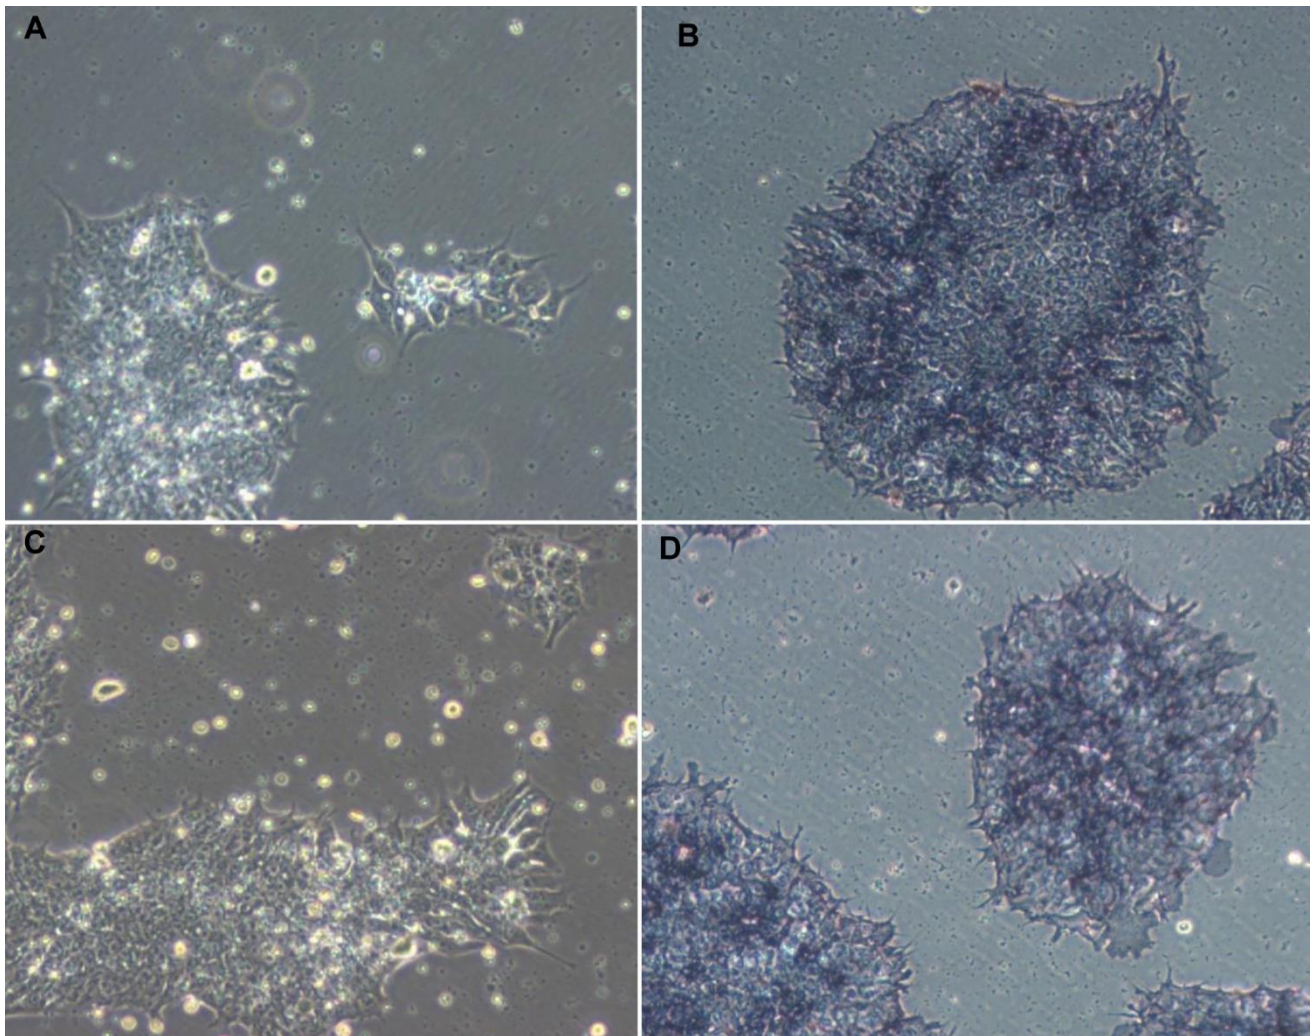

**Figure S2.** Cell morphology and alkaline phosphatase staining of the two iPSC lines. (A) Cell morphology of cell line 1 in bright fields of microscope; (B) cell line 1 showed strong expression of alkaline phosphatase; (C) Cell morphology of cell line 2 in bright fields of microscope; (D) cell line 2 showed strong expression of alkaline phosphatase.

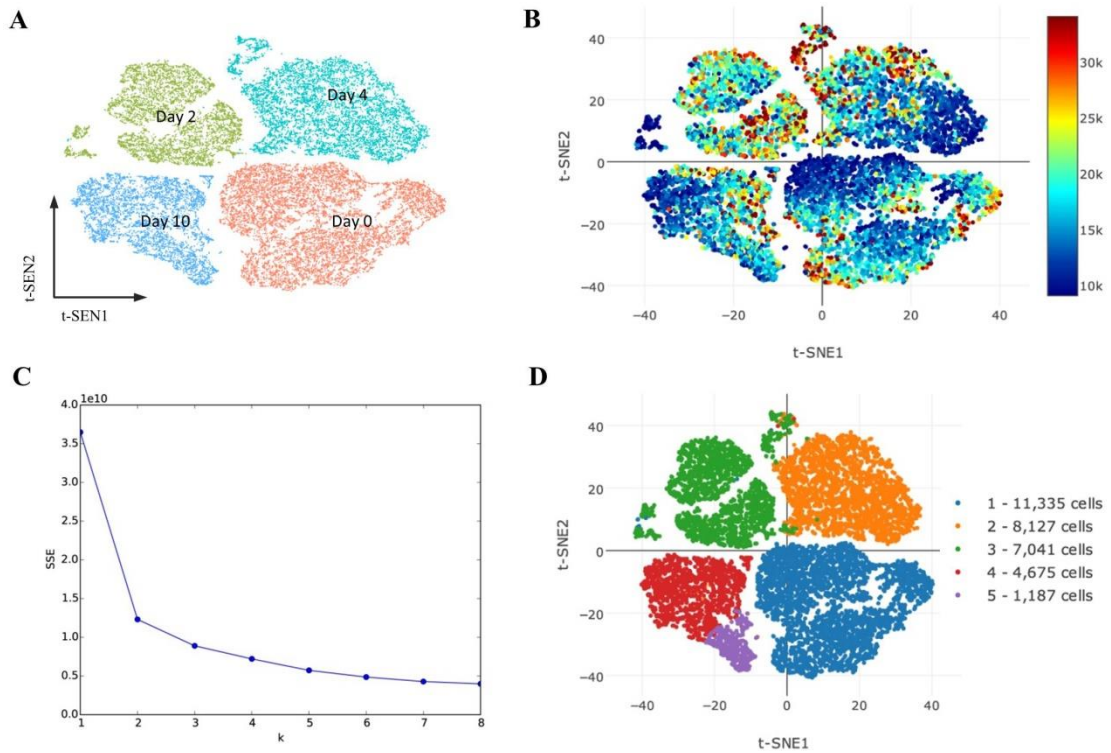

**Figure S3.** Subpopulations of the cell in cardiac differentiation. (A) t-SNE displaying the four clusters of cells collected at the four differentiation time points in cardiac differentiation; (B) t-SNE displaying the cells colored by UMI counts; (C) optimal partitioning of human iPSC-derived cells using k-means with  $k=5$  clusters via the sum of the squared errors as determined above; (D) t-SNE displaying the five clusters of cells partitioning k-means ( $k=5$ ).

**Table S1:** The stage-specific genes emerged in the cardiac differentiation.

[Click here to Download Table S1](#)
